# Supplementary material for: Heat shock protein 90 and calcineurin pathway inhibitors enhance the efficacy of triazoles against Scedosporium prolificans via induction of apoptosis
Source: PubMed Central journal article supplement (PMC5354560; doi:10.15698/mic2014.06.150), 2014-06-02
Supplement: mic-01-179-s01.pdf [file mic-01-179-s01.pdf]

Table S1. Percentage of apoptotic cells and percent fold change in fluorescence in *S. proliferans* germlings (isolate-2) stained with annexin V, TUNEL, PI, DiBAC, DHR-123 and Rh-123.

| Drugs ( $\mu\text{g/ml}$ )            | Apoptotic cells        |                |                |               |               |                |
|---------------------------------------|------------------------|----------------|----------------|---------------|---------------|----------------|
|                                       | Apoptotic protoplast % |                |                | % Fold change |               |                |
|                                       | Annexin V              | TUNEL          | PI             | DiBAC         | ROS           | $\Psi\text{m}$ |
| PCZ + TCR (0.06 $\mu\text{g/ml}$ )    |                        |                |                |               |               |                |
| 0.125                                 | 50.0 $\pm$ 2.0         | 40.0 $\pm$ 3.0 | 2.0 $\pm$ 0.0  | 1.1 $\pm$ 0.0 | 1.0 $\pm$ 0.0 | 1.3 $\pm$ 0.1  |
| 0.25                                  | 60.0 $\pm$ 4.0         | 40.0 $\pm$ 2.0 | -              | 1.4 $\pm$ 0.1 | 1.3 $\pm$ 0.0 | 1.8 $\pm$ 0.0  |
| 0.5                                   | 40.0 $\pm$ 1.0         | 15.0 $\pm$ 1.0 | 20.0 $\pm$ 1.5 | 2.0 $\pm$ 0.0 | 1.2 $\pm$ 0.1 | 1.4 $\pm$ 0.0  |
| ICZ + TCR (0.125 $\mu\text{g/ml}$ )   |                        |                |                |               |               |                |
| 0.060                                 | 65.0 $\pm$ 5.0         | 35.0 $\pm$ 4.0 | 10.0 $\pm$ 1.0 | 1.2 $\pm$ 0.0 | 1.4 $\pm$ 0.0 | 1.0 $\pm$ 0.0  |
| 0.125                                 | 65.0 $\pm$ 5.0         | 55.0 $\pm$ 5.0 | 10.0 $\pm$ 1.0 | 1.3 $\pm$ 0.2 | 1.3 $\pm$ 0.0 | 1.4 $\pm$ 0.2  |
| 0.25                                  | 40.0 $\pm$ 2.0         | 45.0 $\pm$ 4.0 | 25.0 $\pm$ 2.0 | 1.9 $\pm$ 0.9 | 1.0 $\pm$ 0.0 | 1.3 $\pm$ 0.0  |
| PCZ + 17AAG (0.06 $\mu\text{g/ml}$ )  |                        |                |                |               |               |                |
| 0.060                                 | 70.0 $\pm$ 1.0         | 60.0 $\pm$ 2.0 | 5.0 $\pm$ 1.0  | 1.1 $\pm$ 0.0 | 1.4 $\pm$ 0.2 | 1.0 $\pm$ 0.0  |
| 0.125                                 | 50.0 $\pm$ 2.0         | 55.0 $\pm$ 5.0 | 35.0 $\pm$ 1.5 | 1.5 $\pm$ 0.3 | 2.1 $\pm$ 0.0 | 1.7 $\pm$ 0.0  |
| 0.25                                  | 50.0 $\pm$ 5.0         | 30.0 $\pm$ 3.0 | 10.0 $\pm$ 1.0 | 1.4 $\pm$ 0.2 | 1.8 $\pm$ 0.0 | 2.1 $\pm$ 0.5  |
| ICZ + 17AAG (0.125 $\mu\text{g/ml}$ ) |                        |                |                |               |               |                |
| 0.060                                 | 65.0 $\pm$ 5.0         | 50.0 $\pm$ 1.0 | 5.0 $\pm$ 0.0  | 1.1 $\pm$ 0.0 | 1.0 $\pm$ 0.0 | 1.0 $\pm$ 0.0  |
| 0.125                                 | 40.0 $\pm$ 4.0         | 35.0 $\pm$ 1.0 | 15.0 $\pm$ 1.0 | 1.4 $\pm$ 0.0 | 1.9 $\pm$ 0.0 | 1.2 $\pm$ 0.0  |
| 0.25                                  | 35.0 $\pm$ 3.0         | 20.0 $\pm$ 2.0 | 15.0 $\pm$ 1.0 | 2.0 $\pm$ 0.0 | 1.7 $\pm$ 0.0 | 1.2 $\pm$ 0.0  |

-, Not detected (0% of cells showed particular apoptotic marker); TCR or 17AAG control showed  $\leq$ 1 fold increase in fluorescence in comparison with triazoles alone.
